# Supplementary material for: Enzymatic Polymerization on DNA Modified Gold Nanowire for Label-Free Detection of Pathogen DNA
Source: MDPI journal article supplement (doi:10.3390/ijms160613653), 2015-06-15
Supplement: s1 [file s1]

# Supplementary Information

## 1. Supplementary Experimental Section

### 1.1. Materials

All DNA oligonucleotides (H1N1 DNA: 5' ATT CAA ATG GAA CCG TCA AGG-3'; HIV DNA: 5'-GAC TCA GAT TGG TTG CAC TTT-3'; Scramble DNA: TAA TAC GACTCA CTA TAG GGA-3') were purchased from IDT.

### 1.2. Detecting Target DNA in the Presence of a DNA Library

For the selectivity study, circularized DNA was produced in the presence of a library of non-complementary DNA. The linear DNA, target DNA, H1N1 DNA, HIV DNA and Scramble DNA were mixed in nuclease-free water at a final concentration of 7.5  $\mu\text{M}$  each and temperature annealing was followed. The mixture was heated to 95 °C for 2 min, then cooled gradually to 25 °C over a 60-min period. After 20 min incubation at 25 °C, the annealed DNA was mixed with T4 DNA ligase (3 U· $\mu\text{L}^{-1}$ ) and ligase buffer (300 mM Tris-HCl (pH 7.8), 100 mM  $\text{MgCl}_2$ , 100 mM DTT, and 10 mM ATP) and incubated overnight at room temperature. RCA was performed in same way as written in the Experimental Section of this article.

### 1.3. Control Experiment in the Presence of a Library of Non-Complementary DNA

For the control experiment, linear DNA, H1N1 DNA, HIV DNA and Scramble DNA were mixed in nuclease-free water at a final concentration of 7.5  $\mu\text{M}$  each and temperature annealing was followed. The mixture was heated to 95 °C for 2 min, then cooled gradually to 25 °C over a 60-min period. After 20 min incubation at 25 °C, the annealed DNA was mixed with T4 DNA ligase (3 U· $\mu\text{L}^{-1}$ ) and ligase buffer (300 mM Tris-HCl (pH 7.8), 100 mM  $\text{MgCl}_2$ , 100 mM DTT, and 10 mM ATP) and incubated overnight at room temperature. RCA was performed in same way as written in the Experimental Section of this article.

## 2. Detecting Target DNA in the Presence of DNA Library

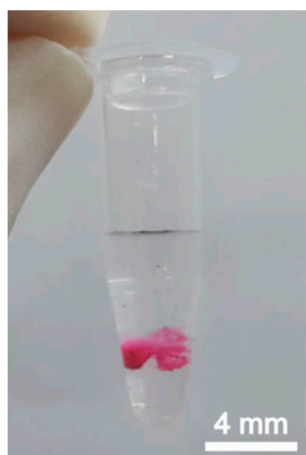

**Figure S1.** Digital camera image of the product of rolling circle amplification in the presence of target DNA and library of non-complementary DNA.

### 3. Control Experiment in the Presence of DNA Library

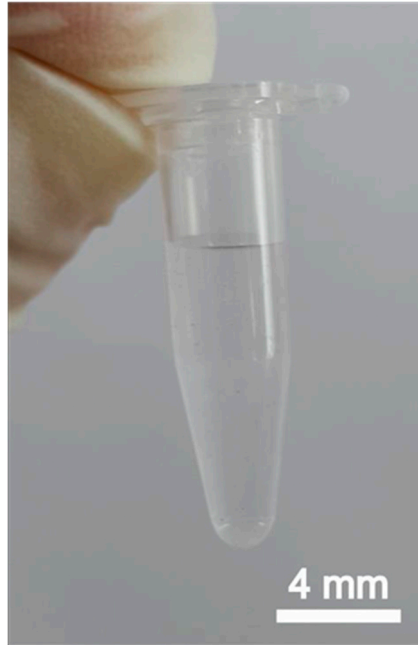

**Figure S2.** Digital camera image after 20 h of rolling circle amplification with library of non-complementary DNA in the absence of target DNA.
